# Supplementary material for: An electrochemical sensing platform amplified with a Au@Ag nanoparticle-decorated three-dimensional N-doped graphene aerogel for ultrasensitive determination of baicalein
Source: Royal Society of Chemistry journal article supplement (doi:10.1039/d0nj03827j), 2020-01-01
Supplement: d0nj03827j1.pdf [file d0nj03827j1.pdf]

**Electrochemical sensing platform amplified with Au@Ag  
nanoparticles decorated three-dimensional N-doped graphene  
aerogel for ultrasensitive determination of baicalein**

Xueliang Niu<sup>a,b\*</sup>, Weili Zhang<sup>c</sup>, Yan Huang<sup>a</sup>, Likai Wang<sup>a</sup>, Zhongfang Li<sup>a</sup> and

Wei Sun<sup>b\*</sup>

*<sup>a</sup>College of Chemistry and Chemical Engineering, Shandong University of  
Technology, Zibo 255049, P. R. China*

*<sup>b</sup>Key Laboratory of Laser Technology and Optoelectronic Functional Materials of  
Hainan Province, College of Chemistry and Chemical Engineering, Hainan Normal  
University, Haikou 571158, P. R. China*

*<sup>c</sup>College of Pharmacy, Key Laboratory of Biomedical Engineering and Technology in  
Universities of Shandong, Qilu Medical University, Zibo 255213, P. R. China*

---

\* Corresponding author. Tel./fax: +86 898 31381637.

E-mail addresses: swyy26@hotmail.com (Wei Sun), [xueliangniu@sdut.edu.cn](mailto:xueliangniu@sdut.edu.cn) (Xueliang Niu)

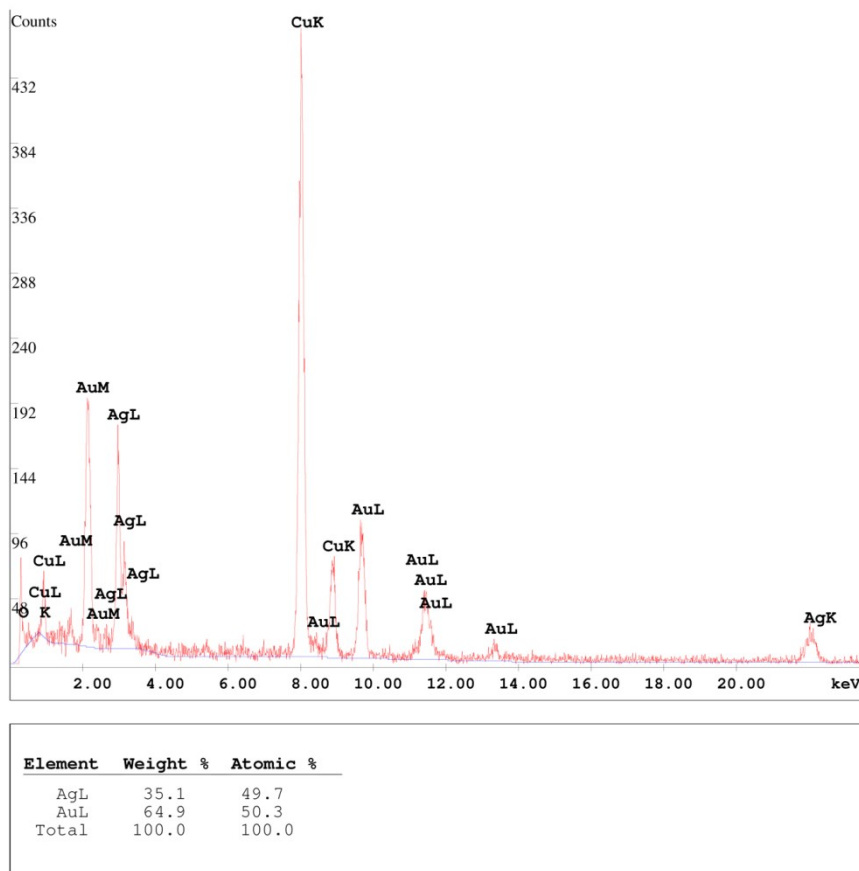

**Fig. S1** Energy dispersive spectroscopy (EDS) spectra of some Au@Ag alloy nanoparticles.

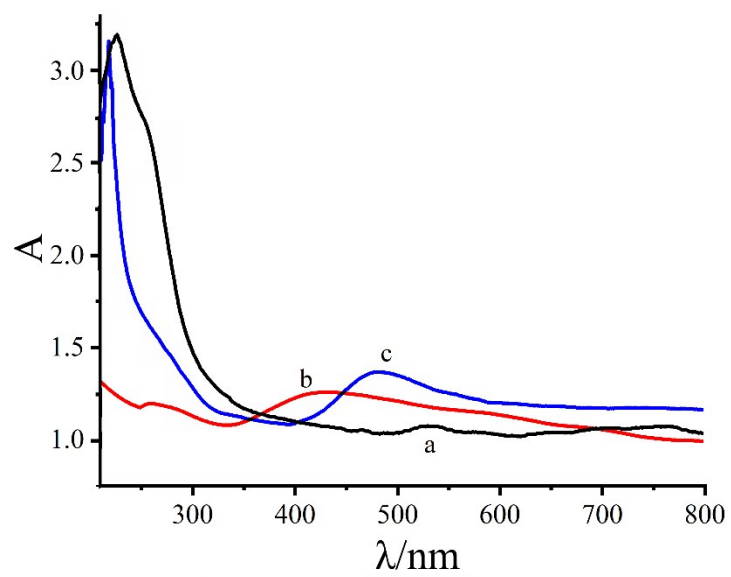

**Fig. S2** UV-vis spectra for AuNPs/3DNGA (a), AgNPs/3DNGA (b), and Au@Ag /3DNGA (c)

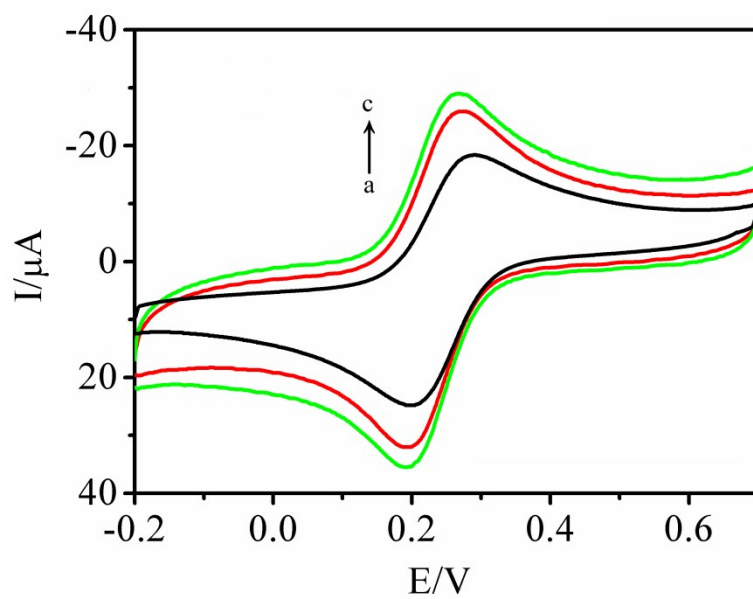

**Fig. S3** CV curves of CILE (a), 3DNGA/CILE (b) and Au@Ag/3DNGA/CILE (c) in a 1.0 mmol/L  $[\text{Fe}(\text{CN})_6]^{3-/4-}$  and 0.5 mol/L KCl solution with the scan rate of 100 mV/s.

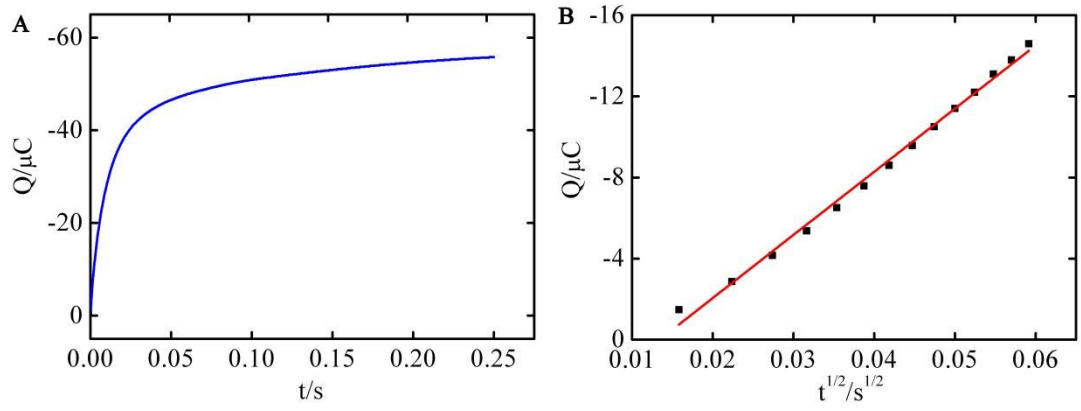

**Fig. S4** (A) Chronometric curves of  $1 \times 10^{-5}$  mol/L baicalein on Au@Ag/3DNGA/CILE; (B) Relationship of  $Q$  from Au@Ag/3DNGA/CILE with  $t^{1/2}$ .

**Table S1** Atomic percentage of different elements in the Au@Ag/3DNGA nanocomposite.

| Matrix      | C1s    | N1s   | O1s   | Au4f  | Ag3d  |
|-------------|--------|-------|-------|-------|-------|
| Au@Ag/3DNGA | 83.23% | 7.57% | 7.38% | 0.76% | 1.06% |

**Table S2** Influence of common coexistent species on baicalein analysis ( $1.0 \times 10^{-6}$  mol/L).

| Coexisting substance | Concentration (mg/L) | Relative error (%) | Coexisting substance | Concentration (mmol/L) | Relative error (%) |
|----------------------|----------------------|--------------------|----------------------|------------------------|--------------------|
| Arginine             | 10.0                 | -1.75              | Ascorbic acid        | 1.0                    | 1.48               |
| Valine               | 10.0                 | -0.28              | Co <sup>2+</sup>     | 1.0                    | -3.20              |
| Alanine              | 10.0                 | -2.59              | Ba <sup>2+</sup>     | 1.0                    | 1.82               |
| Glutamine            | 10.0                 | -0.52              | Ca <sup>2+</sup>     | 1.0                    | -3.88              |
| Proline              | 10.0                 | -3.64              | Cu <sup>2+</sup>     | 1.0                    | -0.77              |
| Tyrosine             | 10.0                 | -3.28              | Cd <sup>2+</sup>     | 1.0                    | -2.37              |
| Lysine               | 10.0                 | -2.15              | Ni <sup>2+</sup>     | 1.0                    | -4.83              |
| Myohemoglobin        | 10.0                 | 3.72               | Pb <sup>2+</sup>     | 1.0                    | 0.37               |
| Glucose              | 10.0                 | -0.74              | Zn <sup>2+</sup>     | 1.0                    | -0.55              |
